# Supplementary material
Source: MDPI journal article supplement (https://www.mdpi.com/2073-4344/5/3/1603)
Supplement: s1 [file s1]

## Supplementary Information

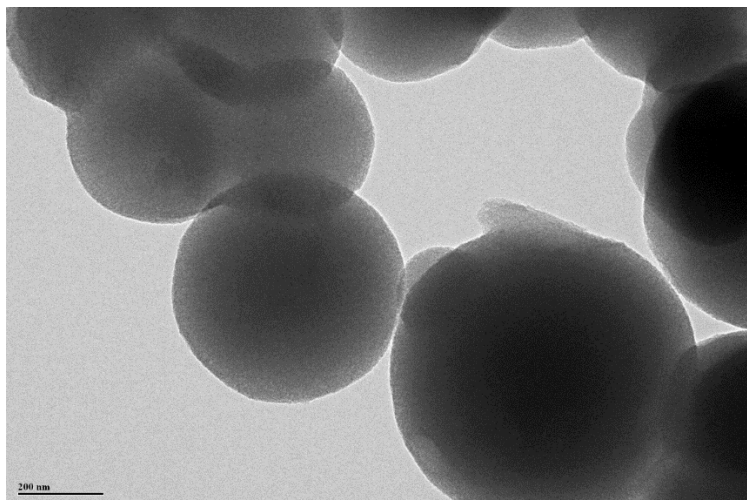

**Figure S1.** Representative low magnification TEM image.

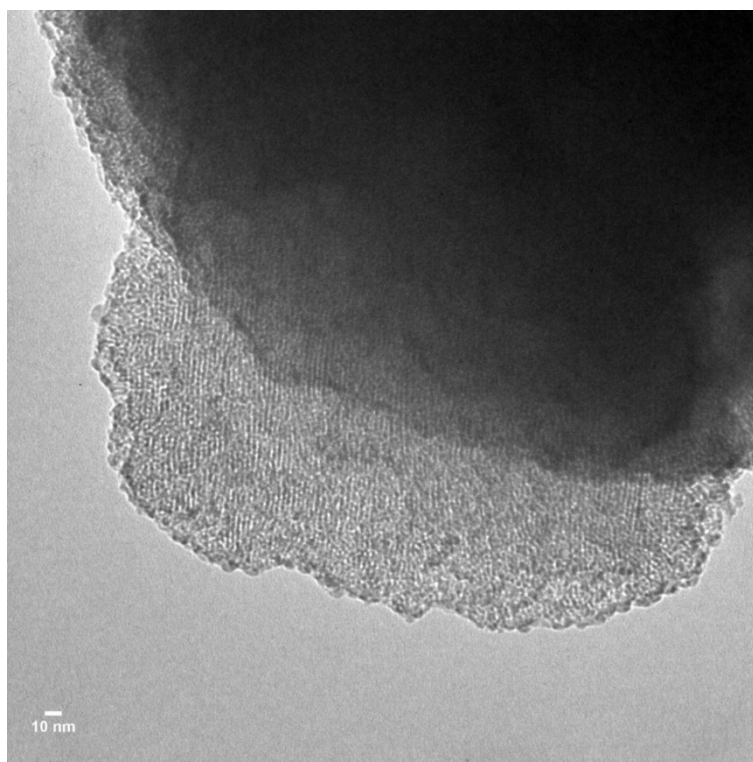

**Figure S2.** Representative high magnification TEM image.

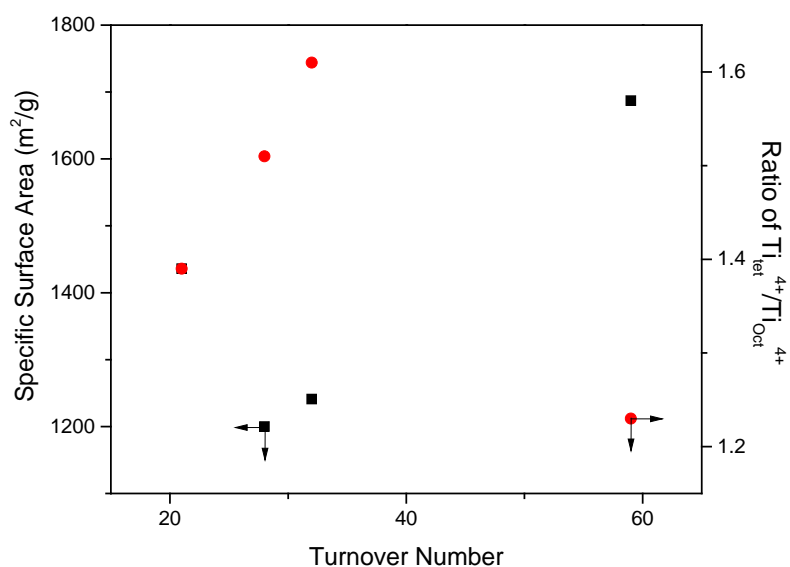

**Figure S3.** Plot representing turnover as a function of specific surface area and ratio of  $Ti_{tet}^{4+}/Ti_{oct}^{4+}$ .

© 2015 by the authors; licensee MDPI, Basel, Switzerland. This article is an open access article distributed under the terms and conditions of the Creative Commons Attribution license (<http://creativecommons.org/licenses/by/4.0/>).
